# Supplementary material
Source: PubMed Central journal article supplement (PMC4522701)

**Supplemental Table 1. Baseline characteristics of participants with and without follow-up left ventricular ejection fraction (LVEF) measurement**

| Characteristic                       | Without Follow-up<br>LVEF measurement<br>(n = 651) | With Follow-up<br>LVEF measurement<br>(n = 538) | p-value |
|--------------------------------------|----------------------------------------------------|-------------------------------------------------|---------|
| Age (year)                           | 62.0 ± 12.9                                        | 58.9 ± 12.2                                     | <0.001  |
| Sex                                  |                                                    |                                                 | 0.05    |
| Male                                 | 490 (75.3)                                         | 377 (70.1)                                      |         |
| Female                               | 161 (24.7)                                         | 161 (29.9)                                      |         |
| Race                                 |                                                    |                                                 | 0.72    |
| White                                | 370 (56.8)                                         | 309 (57.4)                                      |         |
| Black                                | 265 (40.7)                                         | 212 (39.4)                                      |         |
| Other                                | 16 (2.5)                                           | 17 (3.2)                                        |         |
| Body mass index (kg/m <sup>2</sup> ) | 29.5 ± 6.4                                         | 30.0 ± 6.6                                      | 0.18    |
| Smoking                              |                                                    |                                                 | 0.16    |
| Never                                | 209 (32.1)                                         | 189 (35.1)                                      |         |
| Former                               | 292 (44.9)                                         | 249 (46.3)                                      |         |
| Current                              | 150 (23.0)                                         | 100 (18.6)                                      |         |
| Baseline LVEF (%)                    | 22.6 ± 7.5                                         | 21.8 ± 7.2                                      | 0.05    |
| NYHA class                           |                                                    |                                                 | 0.69    |
| Class I                              | 108 (16.6)                                         | 88 (16.4)                                       |         |
| Class II                             | 279 (42.9)                                         | 245 (45.5)                                      |         |
| Class III                            | 262 (40.2)                                         | 202 (37.5)                                      |         |
| Class IV                             | 2 (0.3)                                            | 3 (0.6)                                         |         |
| Cardiomyopathy                       |                                                    |                                                 | <0.001  |
| Non-ischemic                         | 265 (40.7)                                         | 282 (52.4)                                      |         |
| Ischemic                             | 386 (59.3)                                         | 256 (47.6)                                      |         |
| QRS duration (ms)                    | 117.1 ± 29.8                                       | 120.6 ± 31.7                                    | 0.05    |
| Atrial fibrillation                  | 180 (27.6)                                         | 132 (24.5)                                      | 0.22    |
| Diabetes                             | 250 (38.4)                                         | 164 (30.5)                                      | 0.004   |
| Hypertension                         | 444 (68.2)                                         | 303 (56.3)                                      | <0.001  |
| Chronic kidney disease               | 224 (34.4)                                         | 136 (25.3)                                      | <0.001  |
| Medications                          |                                                    |                                                 |         |
| Aspirin                              | 438 (67.3)                                         | 343 (63.8)                                      | 0.20    |
| ACE-I/ARB                            | 470 (72.2)                                         | 380 (70.6)                                      | 0.55    |
| Beta blocker                         | 579 (88.9)                                         | 482 (89.6)                                      | 0.72    |
| Diuretics                            | 472 (72.5)                                         | 385 (71.6)                                      | 0.72    |
| Aldosterone antagonist               | 164 (25.2)                                         | 138 (25.7)                                      | 0.86    |
| Device type                          |                                                    |                                                 | <0.001  |
| ICD                                  | 513 (78.8)                                         | 353 (65.6)                                      |         |
| CRT-D                                | 138 (21.2)                                         | 185 (34.4)                                      |         |

|                                 |              |              |        |
|---------------------------------|--------------|--------------|--------|
| Lowest device cutoff rate (bpm) | 182.7 ± 14.5 | 188.2 ± 14.1 | <0.001 |
| ATP zone used                   | 378 (58.1)   | 316 (58.7)   | 0.27   |
| All-cause mortality             | 282 (43.3)   | 96 (17.8)    | <0.001 |

---

\* Values are numbers (%) or means (SD).

ACCEPTED MANUSCRIPT

**Supplemental Figure 1.** Hazard ratios for all-cause mortality and appropriate shock associated with absolute changes in left ventricular ejection fraction (LVEF) from ICD implantation, using LVEF measurements by echocardiogram only.

The curves represent adjusted hazard ratios and their 95% confidence intervals (dashed lines) based on restricted quadratic splines for absolute change in LVEF with knots at the 5<sup>th</sup>, 50<sup>th</sup>, and 95<sup>th</sup> percentiles of its distribution. The reference values (diamond dots) were set at 0% change in LVEF. Results were obtained from Cox regression models adjusted for age, sex, race, baseline LVEF, smoking status, body mass index, NYHA class, ischemic cardiomyopathy, atrial fibrillation, diabetes, hypertension, chronic kidney disease, device type, and stratified by enrollment center. Histograms represent the frequency distributions of the absolute change in LVEF.

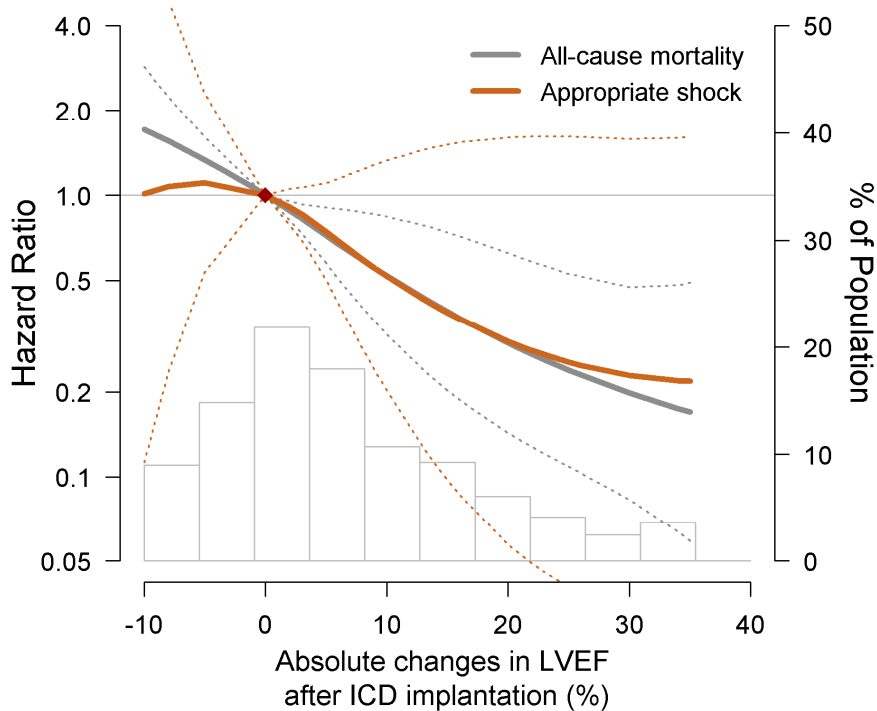

Supplement: NIHMS698271-supplement-01.pdf [file NIHMS698271-supplement-01.pdf]
